# Supplementary material
Source: PubMed Central journal article supplement (PMC4437802)
Supplement: NIHMS525696-supplement-2.pdf [file NIHMS525696-supplement-2.pdf]

Suppl. Table 1a. qPCR primers and reactions for which qPCR values are reported in this study

| Gene    | LocusLink ID | Gene Name                                               | PrimerBank ID | Primer Name                                    | Sequence                                          | Amplicon Size | Intron Spanning | Tm Found | Predicted Tm |
|---------|--------------|---------------------------------------------------------|---------------|------------------------------------------------|---------------------------------------------------|---------------|-----------------|----------|--------------|
| Adora2a | 11540        | Adenosine A2a receptor                                  | 33859500a1    | Adora2a F166-184<br>Adora2a R287-266           | GCCATCCCATTGCGCCATCA<br>GCAATAGCCAAGAGGCTGAAGA    | 122           | N               | 84.6     | 83           |
| Bmpr1a  | 12166        | Bone morphogenetic protein receptor, type 1A            | primer3       | Bmpr1a (B) F1674-1694<br>Bmpr1a (B) R1831-1811 | AGCCCTACATCATGGCTGAC<br>ACACACAACCTCACGCATGT      | 158           | Y               | 78.7     | 79           |
| Bmpr2   | 12168        | Bone morphogenetic protein receptor, type II            | 6680804a2     | Bmpr2 F254-273<br>Bmpr2 R405-385               | GGTCTCACATCGGTGATCCC<br>GTCAGGGGGTGGAAAGTTCTC     | 152           | N               | 78.8     | 80           |
| Lifr    | 16880        | Leukemia inhibitory factor receptor                     | 7305235a1     | Lifr F90-108<br>Lifr R270-250                  | AGCTCTGACCCTCTGCAT<br>TGGGTGACAAGAATGGAACCT       | 181           | Y               | 84.0     | 82           |
| Prkar2b | 19088        | Protein kinase, cAMP dependent regulatory, type II beta | 26334123a2    | Prkar2b F445-467<br>Prkar2b R545-525           | GACATCTGTGTTTAAAGAACCT<br>TGGTCAATTACGTGTTCCCT    | 101           | Y               | 76.5     | 76           |
| Prkcc   | 18752        | Protein kinase C, gamma                                 | 6755080a1     | Prkcc F119-139<br>Prkcc R222-201               | CTCGTTTCTTCAAGCAGCCAA<br>GTGAACCACAAGCTACAGACT    | 104           | Y               | 81.3     | 79           |
| Prkcz   | 18762        | Protein kinase C, zeta                                  | 6679355a1     | Prkcz F89-107<br>Prkcz R279-259                | GCGTGGATGCCATGACAAC<br>AATGATGAGCACTTCGTCCCT      | 191           | Y               | 84.8     | 85           |
| Rgs1    | 50778        | Regulator of G-protein signaling 1                      | 7657512a1     | Rgs1 F148-168<br>Rgs1 R395-374                 | TCTGGGATGAAATCGGCCAAG<br>GCATCTGAATGCACAAATGCTT   | 248           | Y               | 78.1     | 78           |
| Rgs10   | 67865        | Regulator of G-protein signaling 10                     | 13385914a1    | Rgs10 F53-71<br>Rgs10 R209-187                 | TCCATGACGGAGATGGGAG<br>AACAAGACATTCTTCGCTGAA      | 157           | Y               | 82.7     | 82           |
| Rgs12   | 71729        | Regulator of G-protein signaling 12                     | 27777689a2    | Rgs12 F913-933<br>Rgs12 R1077-1059             | CCGGATGATAGGCGGTTCTTC<br>CCCAAACTCCGCGCAATG       | 165           | N               | 83.1     | 84           |
| Rgs13   | 246709       | Regulator of G-protein signaling 13                     | 23346630a1    | Rgs13 F34-56<br>Rgs13 R207-186                 | TGCAGAGATGAATCTAAGAGGCT<br>GGTTTCACATGCCATCCAGAAT | 174           | Y               | 76.9     | 77           |
| Rgs18   | 64214        | Regulator of G-protein signaling 18                     | 12738845a2    | Rgs18 F514-535<br>Rgs18 R630-610               | AGTTTGTATACGGCACAAGCA<br>TGTTGGTCTCTGAGGCTTCC     | 117           | N               | 76.3     | 78           |
| Rgs2    | 19735        | Regulator of G-protein signaling 2                      | 31543586a2    | Rgs2 F364-385<br>Rgs2 R504-484                 | ACCAAATCACCCAAAACTGT<br>GCCACTTGATGCCTCTGGAT      | 141           | Y               | 76.6     | 77           |
| Smad1   | 17125        | MAD homolog 1 (Drosophila)                              | 31543220a1    | Smad1 F1244-1262<br>Smad1 R1390-1369           | GCTTCGTGAAGGGTTGGGG<br>CGGATGAAATAGGATTGTGGGG     | 147           | N               | 83.5     | 84           |
| Smad4   | 17128        | MAD homolog 4 (Drosophila)                              | 31543220a2    | Smad4 F546-564<br>Smad4 R798-776               | ACACCCGCCAAGTAATCGC<br>GGTGGTAGTGCTTATGATGGT      | 253           | Y               | 86.4     | 86           |
| Smad6   | 17130        | MAD homolog 6 (Drosophila)                              | 12836011a2    | Smad6 F266-285<br>Smad6 R421-401               | GCAACCCTACCACTTCAGC<br>GAGCAGTGATGAGGGAGTTGG      | 156           | Y               | 84.6     | 85           |
| Smad7   | 17131        | MAD homolog 7 (Drosophila)                              | 6678778a1     | Smad7 F494-512<br>Smad7 R646-625               | GGCCGGATCTCAGGCATTC<br>TTGGGTATCTGGAGTAAGGAGG     | 153           | Y               | 82.4     | 83           |

Suppl. Table Ib. Expression values of genes referred to herein, generated by second generation microarray screen comparing murine naïve and memory B cells

| Affymetrix ID | Gene    | Fold<br>M/N <sup>b</sup> | T-<br>Test <sup>c</sup> | Expression Value <sup>a</sup> |           |            |            |            |            |          |          |          |          |
|---------------|---------|--------------------------|-------------------------|-------------------------------|-----------|------------|------------|------------|------------|----------|----------|----------|----------|
|               |         |                          |                         | Av<br>Nve                     | Av<br>Mem | Naïve<br>A | Naïve<br>B | Naïve<br>C | Naïve<br>D | Mem<br>A | Mem<br>B | Mem<br>C | Mem<br>D |
| 1427519_at    | Adora2a | 4.83                     | 0.0000                  | 18                            | 88        | 23         | 23         | 13         | 14         | 91       | 94       | 76       | 93       |
| 1460710_at    | Adora2a | 5.71                     | 0.0000                  | 49                            | 282       | 44         | 49         | 57         | 49         | 284      | 284      | 280      | 278      |
| 1420577_at    | Aicda   | 0.19                     | 0.2562                  | 719                           | 139       | 212        | 2103       | 246        | 314        | 158      | 106      | 162      | 131      |
| 1418279_a_at  | Akap1   | 1.50                     | 0.0272                  | 14                            | 21        | 15         | 13         | 14         | 13         | 25       | 23       | 15       | 18       |
| 1449019_at    | Akap1   | 2.17                     | 0.0017                  | 23                            | 51        | 26         | 26         | 18         | 23         | 56       | 61       | 39       | 47       |
| 1430774_at    | Akap10  | 0.93                     | 0.5001                  | 302                           | 281       | 339        | 288        | 344        | 237        | 258      | 251      | 296      | 318      |
| 1441829_s_at  | Akap10  | 1.32                     | 0.1093                  | 218                           | 288       | 214        | 171        | 224        | 263        | 355      | 245      | 223      | 329      |
| 1441830_x_at  | Akap10  | 1.30                     | 0.2066                  | 135                           | 175       | 127        | 92         | 124        | 197        | 209      | 153      | 137      | 202      |
| 1447570_s_at  | Akap10  | 1.00                     | 0.9942                  | 24                            | 24        | 28         | 18         | 25         | 26         | 27       | 17       | 34       | 18       |
| 1421121_at    | Akap10  | 1.04                     | 0.7352                  | 154                           | 160       | 140        | 136        | 173        | 166        | 154      | 165      | 126      | 193      |
| 1428482_at    | Akap10  | 1.01                     | 0.3698                  | 316                           | 320       | 319        | 319        | 306        | 319        | 319      | 324      | 326      | 312      |
| 1434764_at    | Akap11  | 0.88                     | 0.0080                  | 696                           | 614       | 735        | 644        | 699        | 705        | 613      | 636      | 594      | 614      |
| 1419706_a_at  | Akap12  | 0.22                     | 0.0028                  | 64                            | 14        | 39         | 88         | 59         | 67         | 12       | 13       | 13       | 17       |
| 1443923_at    | Akap13  | 2.02                     | 0.0010                  | 583                           | 1177      | 549        | 526        | 654        | 601        | 1389     | 1092     | 956      | 1271     |
| 1455870_at    | Akap2   | 0.93                     | 0.3110                  | 412                           | 383       | 380        | 404        | 456        | 410        | 419      | 368      | 415      | 330      |
| 1449168_a_at  | Akap2   | 0.91                     | 0.3621                  | 383                           | 348       | 345        | 466        | 401        | 319        | 357      | 377      | 331      | 329      |
| 1433669_at    | Akap8   | 0.87                     | 0.0192                  | 1765                          | 1539      | 1859       | 1808       | 1818       | 1575       | 1461     | 1521     | 1576     | 1598     |
| 1450983_at    | Akap8   | 0.90                     | 0.1168                  | 1370                          | 1232      | 1310       | 1428       | 1397       | 1346       | 1171     | 1131     | 1187     | 1441     |
| 1428814_at    | Akap8l  | 1.01                     | 0.8699                  | 40                            | 41        | 41         | 40         | 44         | 37         | 40       | 39       | 42       | 41       |
| 1417734_at    | Akap8l  | 0.86                     | 0.0209                  | 997                           | 853       | 985        | 955        | 1088       | 959        | 764      | 898      | 836      | 914      |
| 1435769_at    | Akap9   | 0.95                     | 0.2284                  | 857                           | 812       | 916        | 872        | 841        | 800        | 782      | 827      | 871      | 768      |
| 1437082_at    | Akap9   | 1.15                     | 0.2097                  | 548                           | 632       | 519        | 540        | 598        | 534        | 657      | 557      | 530      | 782      |
| 1446237_at    | Akap9   | 1.03                     | 0.5283                  | 14                            | 15        | 14         | 13         | 15         | 15         | 14       | 15       | 16       | 14       |
| 1447912_x_at  | Akap9   | 1.02                     | 0.8471                  | 49                            | 50        | 47         | 46         | 56         | 47         | 60       | 45       | 48       | 47       |
| 1447913_x_at  | Akap9   | 1.06                     | 0.0249                  | 25                            | 27        | 25         | 24         | 26         | 26         | 27       | 27       | 27       | 26       |
| 1455151_at    | Akap9   | 1.33                     | 0.1063                  | 695                           | 923       | 682        | 626        | 746        | 726        | 1116     | 642      | 819      | 1116     |
| 1438967_x_at  | Amhr2   | 1.01                     | 0.1861                  | 3                             | 3         | 3          | 3          | 3          | 3          | 3        | 3        | 4        | 3        |
| 1457021_x_at  | Amhr2   | 1.01                     | 0.4388                  | 4                             | 4         | 4          | 4          | 4          | 4          | 4        | 4        | 4        | 4        |
| 1427989_at    | Amhr2   | 1.00                     | 0.8493                  | 4                             | 4         | 4          | 4          | 4          | 4          | 4        | 4        | 4        | 4        |
| 1457687_at    | Bcl2    | 0.55                     | 0.0000                  | 5037                          | 2760      | 5325       | 4571       | 5312       | 4939       | 2429     | 2764     | 2893     | 2953     |

|              |         |       |        |      |      |      |      |      |      |      |      |      |      |
|--------------|---------|-------|--------|------|------|------|------|------|------|------|------|------|------|
| 1427818_at   | Bcl2    | 1.01  | 0.4036 | 11   | 11   | 11   | 11   | 11   | 11   | 11   | 11   | 11   | 11   |
| 1427819_at   | Bcl2    | 0.90  | 0.7107 | 77   | 70   | 70   | 58   | 111  | 70   | 75   | 44   | 48   | 112  |
| 1437122_at   | Bcl2    | 0.54  | 0.0001 | 1609 | 869  | 1710 | 1468 | 1725 | 1532 | 751  | 882  | 918  | 923  |
| 1440770_at   | Bcl2    | 0.81  | 0.3392 | 1202 | 979  | 1161 | 996  | 1688 | 965  | 1053 | 772  | 762  | 1330 |
| 1443837_x_at | Bcl2    | 0.69  | 0.0473 | 1237 | 848  | 1292 | 1144 | 1586 | 928  | 772  | 752  | 801  | 1066 |
| 1422938_at   | Bcl2    | 0.59  | 0.0151 | 251  | 148  | 230  | 211  | 317  | 248  | 119  | 132  | 135  | 208  |
| 1425491_at   | Bmpr1a  | 1.92  | 0.0632 | 22   | 43   | 11   | 44   | 18   | 15   | 41   | 30   | 53   | 46   |
| 1425492_at   | Bmpr1a  | 2.12  | 0.0185 | 148  | 315  | 99   | 266  | 113  | 115  | 395  | 236  | 337  | 291  |
| 1425493_at   | Bmpr1a  | 2.56  | 0.0064 | 17   | 44   | 10   | 34   | 12   | 13   | 53   | 37   | 42   | 45   |
| 1425494_s_at | Bmpr1a  | 2.63  | 0.0126 | 17   | 44   | 9    | 40   | 7    | 12   | 46   | 44   | 44   | 45   |
| 1445413_at   | Bmpr1a  | 1.01  | 0.1082 | 3    | 3    | 3    | 3    | 3    | 3    | 3    | 3    | 4    | 3    |
| 1451729_at   | Bmpr1a  | 1.07  | 0.2056 | 8    | 9    | 8    | 8    | 8    | 8    | 10   | 8    | 8    | 8    |
| 1437312_at   | Bmpr1b  | 1.01  | 0.8004 | 6    | 6    | 6    | 6    | 6    | 6    | 6    | 6    | 6    | 6    |
| 1443720_s_at | Bmpr1b  | 1.13  | 0.1240 | 9    | 10   | 7    | 9    | 9    | 10   | 9    | 10   | 11   | 10   |
| 1422872_at   | Bmpr1b  | 1.01  | 0.9602 | 23   | 23   | 27   | 22   | 16   | 26   | 18   | 24   | 31   | 19   |
| 1419616_at   | Bmpr2   | 0.97  | 0.5601 | 13   | 12   | 13   | 13   | 13   | 12   | 12   | 11   | 12   | 13   |
| 1450357_a_at | Ccr6    | 1.53  | 0.0078 | 2232 | 3411 | 2139 | 1939 | 2264 | 2586 | 3559 | 3537 | 2646 | 3902 |
| 1420404_at   | Cd86    | 1.01  | 0.9448 | 1087 | 1096 | 1176 | 1348 | 1039 | 785  | 1068 | 1085 | 1084 | 1146 |
| 1449858_at   | Cd86    | 1.06  | 0.3025 | 851  | 905  | 825  | 928  | 836  | 815  | 853  | 834  | 921  | 1012 |
| 1417409_at   | Jun     | 0.85  | 0.1389 | 493  | 419  | 478  | 515  | 547  | 433  | 374  | 524  | 404  | 374  |
| 1448694_at   | Jun     | 0.87  | 0.1434 | 163  | 142  | 189  | 166  | 147  | 150  | 132  | 153  | 157  | 126  |
| 1425107_a_at | Lifr    | 25.40 | 0.0012 | 15   | 368  | 13   | 17   | 13   | 14   | 511  | 410  | 330  | 222  |
| 1447098_at   | Lifr    | 1.07  | 0.0151 | 11   | 11   | 11   | 10   | 10   | 11   | 11   | 11   | 12   | 11   |
| 1450207_at   | Lifr    | 1.53  | 0.0063 | 6    | 8    | 7    | 6    | 5    | 5    | 9    | 9    | 9    | 7    |
| 1434178_at   | Mil3    | 1.03  | 0.7665 | 1172 | 1202 | 1140 | 1160 | 1300 | 1088 | 1202 | 1025 | 1156 | 1424 |
| 1434179_at   | Mil3    | 0.99  | 0.9320 | 3516 | 3495 | 3681 | 3606 | 3711 | 3065 | 3241 | 3240 | 3510 | 3989 |
| 1457193_at   | Mil3    | 1.51  | 0.0499 | 188  | 285  | 143  | 191  | 188  | 232  | 320  | 217  | 237  | 366  |
| 1427150_at   | Mil3    | 1.25  | 0.0602 | 1115 | 1398 | 1116 | 1133 | 1150 | 1060 | 1473 | 1588 | 1043 | 1486 |
| 1448757_at   | Pml     | 1.53  | 0.0003 | 1470 | 2247 | 1367 | 1438 | 1377 | 1697 | 2186 | 2276 | 2107 | 2419 |
| 1459137_at   | Pml     | 2.57  | 0.0386 | 43   | 109  | 41   | 39   | 53   | 37   | 96   | 83   | 75   | 183  |
| 1447635_at   | Prkar1a | 0.91  | 0.0839 | 13   | 12   | 12   | 14   | 14   | 12   | 12   | 12   | 12   | 11   |
| 1452032_at   | Prkar1a | 0.83  | 0.0063 | 4393 | 3629 | 4522 | 4407 | 4431 | 4213 | 3392 | 3951 | 3271 | 3904 |
| 1425550_a_at | Prkar1a | 0.84  | 0.0640 | 1190 | 1003 | 1163 | 1272 | 1222 | 1101 | 892  | 991  | 912  | 1214 |
| 1434325_x_at | Prkar1b | 0.96  | 0.7939 | 12   | 12   | 11   | 11   | 10   | 17   | 13   | 12   | 11   | 11   |
| 1440132_s_at | Prkar1b | 0.93  | 0.3587 | 20   | 19   | 18   | 24   | 18   | 20   | 19   | 19   | 19   | 19   |
| 1440133_x_at | Prkar1b | 1.02  | 0.0524 | 48   | 49   | 48   | 48   | 47   | 48   | 48   | 49   | 49   | 48   |

|              |           |       |        |       |      |       |       |       |       |      |      |      |      |
|--------------|-----------|-------|--------|-------|------|-------|-------|-------|-------|------|------|------|------|
| 1416753_at   | Prkar1b   | 1.03  | 0.4397 | 19    | 19   | 19    | 19    | 18    | 19    | 19   | 21   | 19   | 19   |
| 1416754_at   | Prkar1b   | 1.03  | 0.0805 | 18    | 19   | 18    | 18    | 18    | 18    | 18   | 19   | 19   | 18   |
| 1427414_at   | Prkar2a   | 1.53  | 0.0464 | 13    | 20   | 13    | 11    | 14    | 14    | 21   | 20   | 13   | 26   |
| 1428783_at   | Prkar2a   | 1.82  | 0.0002 | 147   | 268  | 141   | 174   | 144   | 129   | 262  | 292  | 241  | 278  |
| 1432409_at   | Prkar2a   | 0.97  | 0.5219 | 17    | 16   | 16    | 16    | 17    | 19    | 16   | 17   | 17   | 16   |
| 1452915_at   | Prkar2a   | 1.69  | 0.0001 | 416   | 704  | 436   | 481   | 368   | 378   | 749  | 659  | 688  | 718  |
| 1430640_a_at | Prkar2b   | 21.83 | 0.0003 | 24    | 518  | 32    | 23    | 15    | 25    | 541  | 445  | 395  | 692  |
| 1438664_at   | Prkar2b   | 39.86 | 0.0000 | 101   | 4045 | 146   | 74    | 78    | 108   | 5006 | 3737 | 3745 | 3692 |
| 1456475_s_at | Prkar2b   | 34.83 | 0.0000 | 164   | 5715 | 234   | 148   | 127   | 148   | 6384 | 5309 | 4964 | 6201 |
| 1455758_at   | Prkcc     | 14.28 | 0.0000 | 18    | 258  | 18    | 21    | 10    | 23    | 301  | 258  | 208  | 263  |
| 1421446_at   | Prkcc     | 30.84 | 0.0001 | 13    | 392  | 14    | 14    | 9     | 14    | 480  | 393  | 275  | 419  |
| 1449692_at   | Prkcz     | 1.06  | 0.0772 | 6     | 7    | 6     | 6     | 6     | 6     | 6    | 7    | 7    | 6    |
| 1454902_at   | Prkcz     | 3.62  | 0.0009 | 35    | 126  | 23    | 37    | 38    | 41    | 135  | 112  | 95   | 161  |
| 1418085_at   | Prkcz     | 6.38  | 0.0000 | 43    | 272  | 35    | 61    | 33    | 42    | 269  | 290  | 231  | 299  |
| 1417601_at   | Rgs1      | 0.65  | 0.0824 | 38    | 25   | 29    | 40    | 28    | 55    | 23   | 22   | 29   | 25   |
| 1416882_at   | Rgs10     | 0.14  | 0.0000 | 910   | 125  | 842   | 1112  | 885   | 800   | 117  | 117  | 136  | 131  |
| 1457511_at   | Rgs12     | 0.89  | 0.1342 | 12    | 11   | 14    | 11    | 13    | 11    | 10   | 11   | 12   | 11   |
| 1459566_at   | Rgs12     | 1.05  | 0.1295 | 19    | 20   | 19    | 20    | 19    | 19    | 19   | 21   | 20   | 19   |
| 1429380_at   | Rgs12     | 1.02  | 0.1394 | 8     | 8    | 8     | 8     | 8     | 8     | 8    | 8    | 8    | 8    |
| 1453129_a_at | Rgs12     | 0.51  | 0.0007 | 46    | 23   | 48    | 38    | 44    | 52    | 21   | 20   | 28   | 24   |
| 1442263_at   | Rgs13     | 0.44  | 0.0000 | 14680 | 6407 | 14280 | 14782 | 14375 | 15283 | 6221 | 4890 | 7634 | 6883 |
| 1420398_at   | Rgs18     | 0.62  | 0.0008 | 1850  | 1141 | 1949  | 1518  | 1912  | 2020  | 1138 | 1088 | 1164 | 1174 |
| 1449856_at   | Rgs18     | 0.59  | 0.0005 | 482   | 285  | 537   | 408   | 463   | 518   | 278  | 280  | 291  | 292  |
| 1419247_at   | Rgs2      | 0.28  | 0.0000 | 989   | 273  | 936   | 935   | 1083  | 1002  | 248  | 244  | 294  | 304  |
| 1419248_at   | Rgs2      | 0.30  | 0.0000 | 3801  | 1152 | 4073  | 3450  | 3948  | 3734  | 974  | 1017 | 1353 | 1264 |
| 1450265_at   | Samd9 (8) | 1.02  | 0.0902 | 6     | 6    | 6     | 6     | 6     | 6     | 6    | 6    | 6    | 6    |
| 1419480_at   | Sell      | 1.00  | 0.9921 | 2535  | 2536 | 2768  | 2542  | 2493  | 2335  | 2398 | 2856 | 2368 | 2524 |
| 1419481_at   | Sell      | 0.95  | 0.2347 | 5355  | 5094 | 5338  | 5139  | 5468  | 5477  | 4674 | 5551 | 5005 | 5146 |
| 1459843_s_at | Smad1     | 0.50  | 0.0019 | 49    | 25   | 59    | 43    | 40    | 53    | 27   | 23   | 28   | 20   |
| 1416081_at   | Smad1     | 1.02  | 0.2036 | 5     | 5    | 5     | 5     | 5     | 5     | 5    | 5    | 5    | 5    |
| 1448208_at   | Smad1     | 0.78  | 0.0572 | 76    | 59   | 85    | 70    | 71    | 80    | 43   | 57   | 69   | 69   |
| 1444205_at   | Smad4     | 1.01  | 0.6835 | 12    | 12   | 12    | 12    | 12    | 12    | 11   | 12   | 12   | 12   |
| 1422485_at   | Smad4     | 1.07  | 0.1499 | 635   | 680  | 633   | 617   | 685   | 603   | 676  | 709  | 622  | 712  |
| 1422486_a_at | Smad4     | 0.87  | 0.0661 | 1364  | 1187 | 1450  | 1452  | 1395  | 1158  | 1104 | 1143 | 1257 | 1242 |
| 1422487_at   | Smad4     | 0.96  | 0.2764 | 2988  | 2854 | 3118  | 2848  | 3111  | 2874  | 2656 | 2822 | 3065 | 2873 |
| 1433641_at   | Smad5     | 0.91  | 0.0906 | 299   | 273  | 300   | 300   | 301   | 294   | 258  | 265  | 260  | 311  |

|              |       |      |        |      |      |      |      |      |      |      |      |      |      |
|--------------|-------|------|--------|------|------|------|------|------|------|------|------|------|------|
| 1421047_at   | Smad5 | 1.04 | 0.4817 | 27   | 28   | 26   | 27   | 27   | 27   | 28   | 28   | 25   | 31   |
| 1451873_a_at | Smad5 | 1.05 | 0.4398 | 90   | 94   | 93   | 91   | 83   | 93   | 89   | 91   | 108  | 89   |
| 1422771_at   | Smad6 | 1.01 | 0.6563 | 5    | 5    | 5    | 5    | 5    | 5    | 5    | 5    | 5    | 5    |
| 1422771_at   | Smad6 | 1.01 | 0.6563 | 5    | 5    | 5    | 5    | 5    | 5    | 5    | 5    | 5    | 5    |
| 1422771_at   | Smad6 | 1.01 | 0.6563 | 5    | 5    | 5    | 5    | 5    | 5    | 5    | 5    | 5    | 5    |
| 1423389_at   | Smad7 | 0.59 | 0.0001 | 322  | 190  | 316  | 306  | 337  | 327  | 191  | 191  | 218  | 159  |
| 1440952_at   | Smad7 | 0.57 | 0.0156 | 35   | 20   | 31   | 44   | 40   | 26   | 18   | 18   | 18   | 26   |
| 1443771_x_at | Smad7 | 0.60 | 0.0010 | 400  | 242  | 390  | 384  | 432  | 395  | 282  | 205  | 285  | 196  |
| 1416723_at   | Tcf4  | 1.00 | 0.9804 | 5117 | 5111 | 5454 | 4999 | 5127 | 4887 | 4916 | 4756 | 5232 | 5541 |
| 1416724_x_at | Tcf4  | 1.09 | 0.1383 | 3167 | 3461 | 3135 | 3184 | 3122 | 3227 | 3564 | 3500 | 2986 | 3794 |
| 1416725_at   | Tcf4  | 1.08 | 0.4483 | 164  | 177  | 138  | 144  | 169  | 204  | 198  | 160  | 180  | 171  |
| 1434148_at   | Tcf4  | 0.95 | 0.3784 | 4077 | 3876 | 4270 | 3804 | 4180 | 4054 | 4137 | 3474 | 4241 | 3653 |
| 1434149_at   | Tcf4  | 1.06 | 0.3155 | 2230 | 2363 | 2205 | 1996 | 2262 | 2457 | 2291 | 2223 | 2364 | 2575 |
| 1439336_at   | Tcf4  | 1.34 | 0.1349 | 158  | 211  | 163  | 140  | 187  | 143  | 230  | 181  | 152  | 283  |
| 1440106_at   | Tcf4  | 1.33 | 0.1759 | 6    | 9    | 7    | 6    | 9    | 4    | 7    | 9    | 7    | 11   |
| 1442903_at   | Tcf4  | 0.39 | 0.0017 | 184  | 72   | 198  | 223  | 188  | 126  | 64   | 78   | 74   | 74   |
| 1446386_at   | Tcf4  | 0.67 | 0.0662 | 65   | 43   | 56   | 92   | 60   | 50   | 37   | 47   | 42   | 47   |
| 1446953_at   | Tcf4  | 1.05 | 0.6902 | 542  | 569  | 607  | 530  | 596  | 434  | 572  | 433  | 580  | 693  |
| 1458201_at   | Tcf4  | 0.91 | 0.3281 | 482  | 438  | 448  | 422  | 585  | 474  | 469  | 382  | 432  | 470  |
| 1421983_s_at | Tcf4  | 1.02 | 0.0930 | 5    | 5    | 5    | 5    | 5    | 5    | 5    | 5    | 5    | 5    |
| 1450447_at   | Tcf4  | 0.91 | 0.5372 | 22   | 20   | 25   | 19   | 21   | 23   | 18   | 26   | 22   | 13   |
| 1424089_a_at | Tcf4  | 1.10 | 0.0701 | 4600 | 5080 | 4513 | 4126 | 4768 | 4991 | 5258 | 5040 | 4769 | 5254 |

<sup>a</sup>Expression values generated after GCRMA normalization of Affymetrix .cel files. A-D refer to replicates of naïve (Nve) or memory (Mem) samples. The averages (Av) of these values are also listed.

<sup>b</sup>Fold difference between the average memory and average naïve expression values.

<sup>c</sup>Student's t-test p values of naïve versus memory expression values.
